# Supplementary material
Source: PubMed Central journal article supplement (PMC2930691)
Supplement: supp_M110.123083_jbc.M110.123083-1.pdf [file supp_M110.123083_jbc.M110.123083-1.pdf]

**Supporting Information:** Pu, M., Orr, A., Redfield, A. G., and Roberts, M. F., “Defining specific lipid binding sites for a peripheral membrane protein in situ using sub-Tesla field cycling NMR”

**Effect of PI-PLC concentration on PRE:**

To show that the PRE measured for this  $^{31}\text{P}$  reflects protein interacting specifically with the phospholipid, we examined the PRE for spin-labeled H82C PI-PLC interacting with PMe in 5mM PMe/5 mM PC vesicles (Figure S.1). This spin-labeled protein was chosen because it is proximal to the active site and should definitely have an effect on the PMe. With 0.5 mg/ml protein, there was a significant increase in the  $R_1$  at very low field consistent with proximity of the spin-label and bound PMe. Doubling the amount of protein roughly doubled the  $R_1$  for PMe. For comparison, the  $R_v(0)$  value for PMe in the presence of unlabeled protein is  $4.4 \pm 0.4 \text{ s}^{-1}$ . From this comparison, we chose to use 0.5 mg/ml of the different spin-labeled proteins since  $R_1 > 10 \text{ s}^{-1}$  is difficult to measure accurately, and the lower protein concentration allows us to measure  $R_1$  at lower fields, improving the accuracy of the data analysis for  $\Gamma_{\text{P-e}}$ .

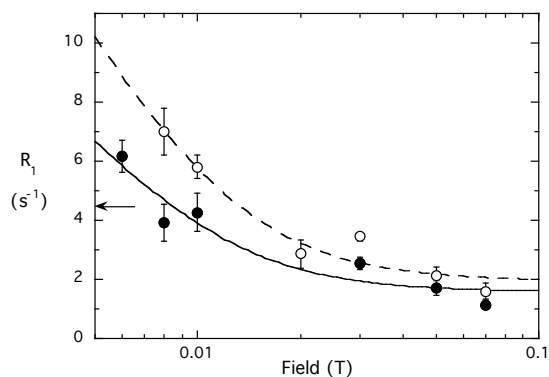

Fig. S.1. Effect of spin-labeled H82C PI-PLC concentration (●, 0.5 mg/ml; ○, 1.0 mg/ml) on the low field relaxation rate for PMe in vesicles with PC. The arrow indicates  $R_v(0)$  for these vesicles with unlabeled protein added.

**Analysis of spin-labeled PI-PLC effects on short-chain phosphatidylcholines:**

The PRE for  $\text{diC}_6\text{PC}$  caused by spin-labeled PI-PLC (either D205C and H82C) was initially fit with a single correlation time as shown by the dashed line in Fig. 3B. The optimum fit yielded  $\tau_{\text{P-e}}$  and  $\Delta R_{\text{P-e}}(0)$  as  $70 \pm 8.8 \text{ ns}$  and  $0.95 \pm 0.07 \text{ s}^{-1}$ , respectively, for spin-labeled D205C; for spin-labeled H82C,  $\tau_{\text{P-e}} = 37.7 \pm 4.5 \text{ ns}$  and  $\Delta R_{\text{P-e}}(0) = 0.17 \pm 0.01 \text{ s}^{-1}$ . However, fitting the data with a single correlation time, clearly underestimates the spin-label-enhanced relaxation in the region above 0.5 T. This systematic deviation suggested that there are two discrete dispersions in this profile, one with a slower correlation time ( $\tau_s$ ) that is dominant below 0.1 T, and one on a faster time scale ( $\tau_f$ ). Therefore, these data were fit with the following expression:

$$\Delta R_1 = \Delta R_s(0)/(1 + \omega^2\tau_s^2) + \Delta R_f(0)/(1 + \omega^2\tau_f^2) .$$

In analogy to the motions contributing to phospholipid  $^{31}\text{P}$  relaxation in vesicles (1), the two time-scales likely represent a molecular wobble ( $\tau_f$ ) and overall micelle rotation ( $\tau_s$ ). Figure S.2. shows the contribution of each dipolar dispersion to the PRE curve for spin-labeled D205C. Comparing values extracted using a single correlation time versus two (Table 2) shows that while the  $\Delta R_{\text{P-e}}(0)$  term is essentially the same, the  $\tau$  value is 60% as much as  $\tau_s$ . This would reduce the estimated P-e distance by  $(0.6)^{-6}$  or 8-9%.  $\tau_s$ , rather than  $\tau_f$ , is used to estimate the P-e distance since it is more selective for a discrete complex (which has to have a lifetime at least as long as  $\tau_s$ , 112 ns).

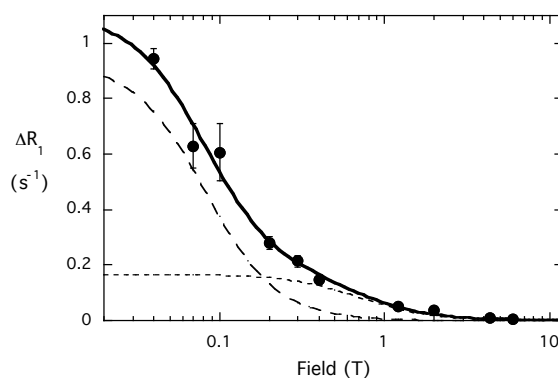

Fig. S.2. Contribution of the slow (---) and fast (···) correlation times to  $\Delta R_1$ , the PRE for  $\text{diC}_6\text{PC}$  (●) bound to spin-labeled 0.5 mg/ml D205C PI-PLC.

While neither spin-labeled protein had much of an effect on 5 mM (or 10 mM)  $\text{diC}_4\text{PC}$  relaxation rates, a small amount of additional relaxation was observed with spin-labeled D205C (see blow-up of the field dependence for this short-chain PC with both labeled D205C and H82C in Figure S.3). The residual relaxation

due to the spin-labeled D205C is  $0.042 \text{ s}^{-1}$  (spin-labeled H82C has no effect and its profile is essentially equivalent to diC<sub>4</sub>PC alone) and the correlation time describing this is in the ns range (much like  $\tau_f$  for the diC<sub>6</sub>PC PRE). If we assume that diC<sub>4</sub>PC binds to the same site as diC<sub>6</sub>PC, we can use the ratio of  $\Delta R_{pe}(0)$  for 5 mM diC<sub>4</sub>PC compared to the value for 5 mM diC<sub>6</sub>PC (where we assume, at least to a first approximation, that the PC site is completely occupied) to estimate the fraction of diC<sub>4</sub>PC bound to protein (0.25). This then provides a rough estimate of the  $K_d$  as 15 mM for diC<sub>4</sub>PC binding to PI-PLC. The poor binding to PI-PLC of diC<sub>4</sub>PC compared to diC<sub>6</sub>PC that is monitored by these NMR experiments is consistent with its lack of kinetic activation of this bacterial PI-PLC (2).

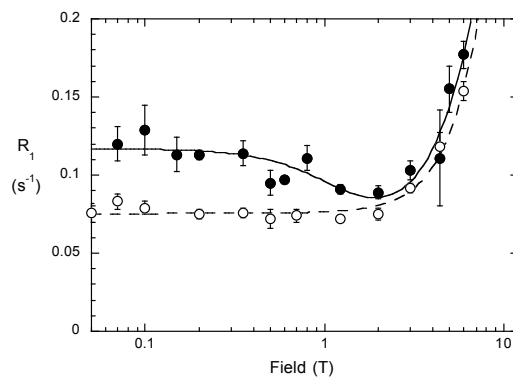

Fig. S.3. Field dependence of the  $R_1$  for diC<sub>4</sub>PC (5 mM) in the presence of 14.4  $\mu\text{M}$  spin-labeled D205C (■) or H82C (□).

### Modeling of butylphosphocholine binding to the W47A/W242A dimer using Autodock4:

Binding of the butylphosphocholine was also evaluated to the structure of a mutated PI-PLC, W47A/W242A, that crystallized as a dimer (PDB code 2OR2 (3)). This structure is unlikely to be identical to a membrane bound dimer, should a PI-PLC dimer be formed on membranes, because the two tryptophan residues necessary for binding to PC vesicles (4) have been replaced by alanine. Nonetheless, the butylphosphocholine was docked to this dimeric structure to see if a site for PC could be predicted and whether or not the same region suggested with docking to the monomer would be identified. As shown in Figure S.4, the same region of the protein was highlighted by AUTODOCK as interacting with a phosphocholine headgroup, although individual interactions of protein molecules with the phosphocholine moiety were slightly different than when this ligand was docked to the monomer PI-PLC. In the dimer complex, energy minimization yielded structures where the phosphocholine phosphate moiety was significantly closer to the Asp205 carboxylate ( $\sim 5 \text{ \AA}$ ) than in monomer structure ( $\sim 8 \text{ \AA}$ ).

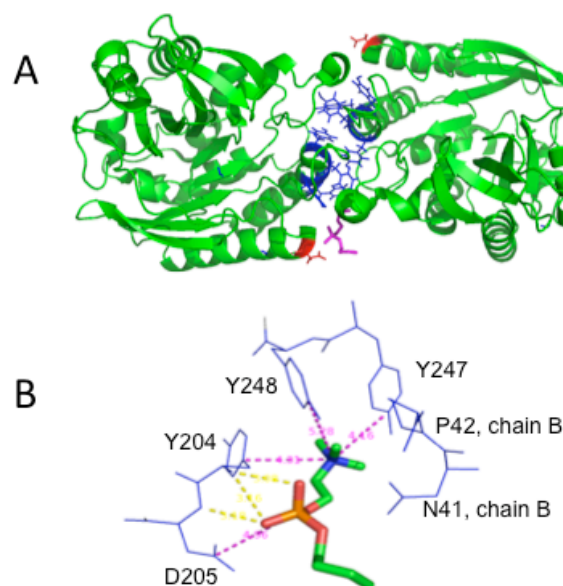

Fig. S.4. (A) Representative energy minimized structure of butylphosphocholine (pink) bound to the PI-PLC dimer structure. The tyrosine residues forming the dimer interface are blue. The red residue is Asp205. (B) Ligands forming the binding picket for butylphosphocholine; yellow dotted lines represent hydrogen bonds while the pink dotted lines indicate distances of atoms in different residues to the phosphocholine atoms.

### References:

1. Klauda, J. B., Roberts, M. F., Redfield, A. G., Brooks, B. R., and Pastor, R. W. (2008) Rotation of lipids in membranes: molecular dynamics simulation,  $^{31}\text{P}$  spin lattice relaxation, and rigid-body dynamics. *Biophys. J.* **94**, 3074-3083
2. Zhou, C., Wu, Y., and Roberts, M. F. (1997) Activation of phosphatidylinositol-specific phospholipase C toward inositol 1,2-(cyclic)-phosphate. *Biochemistry* **36**, 347-355
3. Shao, C., Shi, X., Wehbi, H., Zambonelli, C., Head, J. F., Seaton, B. A., and Roberts, M. F. (2007) Dimer structure of an interfacially impaired phosphatidylinositol-specific phospholipase C. *J. Biol. Chem.* **282**, 9228-9235
4. Feng, J., Wehbi, H., and Roberts, M. F. (2002) Role of tryptophan residues in interfacial binding of phosphatidylinositol-specific phospholipase C. *J. Biol. Chem.* **277**, 19867-19875
